# Supplementary material for: The Hepatitis B Virus Ribonuclease H Is Sensitive to Inhibitors of the Human Immunodeficiency Virus Ribonuclease H and Integrase Enzymes
Source: PubMed Central journal article supplement (PMC3551811; doi:10.1371/journal.ppat.1003125), 2013-01-22
Supplement: ppat.1003125.s001.pdf [file ppat.1003125.s001.pdf]

## Supplemental Figure 1.

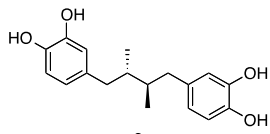

Sigma 74540

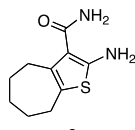

Sigma n8164

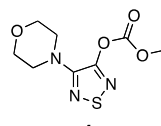

Tim Tec ST029023

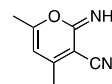

Enamine T0506-3483

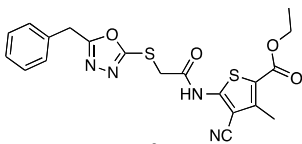

Chembridge 7929959

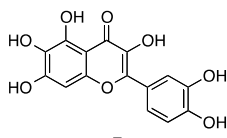

Indofine 021030

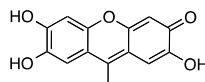

Sigma S439274

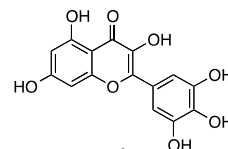

Sigma 70050

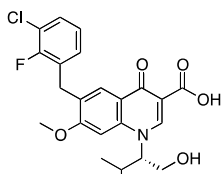

Selleck Chemicals S2001  
**GS9137 (elvitegravir)**

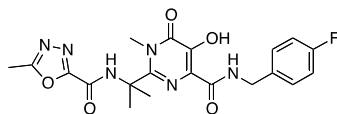

Selleck Chemicals S2005  
**MK0518 (raltegravir)**

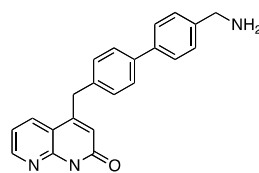

NAPHRHI

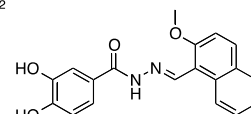

DHBNH

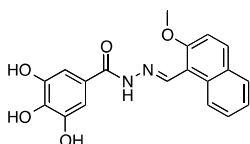

THBNH

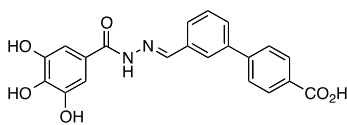

BHMP07

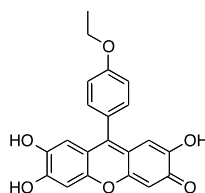

Chembridge 7248520

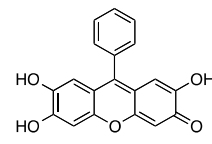

ChemBridge 5104346

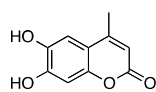

Indofine D-009

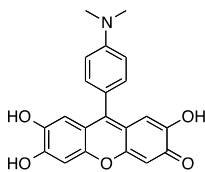

TCI America D1118

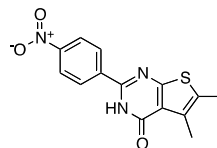

Vistas M Lab STK317995

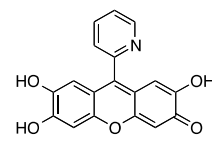

Asinex BAS0223612

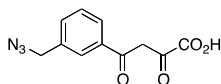

118-D-24
