# Supplementary material for: The Hepatitis B Virus Ribonuclease H Is Sensitive to Inhibitors of the Human Immunodeficiency Virus Ribonuclease H and Integrase Enzymes
Source: PubMed Central journal article supplement (PMC3551811; doi:10.1371/journal.ppat.1003125), 2013-01-22
Supplement: ppat.1003125.s002.pdf [file ppat.1003125.s002.pdf]

**Supplemental Table 1.**

| <b>Compound</b> | <b>Residual activity at 10 <math>\mu</math>M<sup>1</sup></b> |                   |
|-----------------|--------------------------------------------------------------|-------------------|
|                 | <b>Genotype D</b>                                            | <b>Genotype H</b> |
| 2               | 54 $\pm$ 18                                                  | 67 $\pm$ 20       |
| 3               | 43 $\pm$ 14                                                  | 68 $\pm$ 14       |
| 4               | 35 $\pm$ 6                                                   | 68 $\pm$ 18       |
| 5               | 42 $\pm$ 15                                                  | 76 $\pm$ 14       |
| 6               | 40 $\pm$ 16                                                  | 81 $\pm$ 24       |
| 7               | 45 $\pm$ 19                                                  | 68 $\pm$ 24       |
| 8               | 33 $\pm$ 17                                                  | 74 $\pm$ 21       |
| 9               | 33 $\pm$ 10                                                  | 66 $\pm$ 23       |
| 10              | 30 $\pm$ 8                                                   | 66 $\pm$ 21       |
| 11              | 29 $\pm$ 18                                                  | 63 $\pm$ 21       |
| 12              | 28 $\pm$ 12                                                  | 17 $\pm$ 6        |
| 13              | 52 $\pm$ 12                                                  | 42 $\pm$ 26       |
| 14              | 46 $\pm$ 20                                                  | 27 $\pm$ 13       |
| 15              | 47 $\pm$ 4                                                   | 37 $\pm$ 23       |
| 30              | 23 $\pm$ 6                                                   | 37 $\pm$ 8        |
| 31              | 26 $\pm$ 15                                                  | 50 $\pm$ 10       |
| 34              | 30 $\pm$ 15                                                  | 33 $\pm$ 12       |
| 35              | 27 $\pm$ 14                                                  | 38 $\pm$ 20       |
| 38              | 24 $\pm$ 1                                                   | 38 $\pm$ 25       |
| 39              | 21 $\pm$ 2                                                   | 26 $\pm$ 0        |
| 40              | 21 $\pm$ 16                                                  | 22 $\pm$ 2        |

<sup>1</sup> Percent DMSO control  $\pm$  standard deviation
